# Supplementary material for: Increasing the thermoelectric power factor of solvent-treated PEDOT:PSS thin films on PDMS by stretching
Source: Royal Society of Chemistry journal article supplement (doi:10.1039/c8ta03606c), 2018-01-01
Supplement: c8ta03606c1.pdf [file c8ta03606c1.pdf]

# Supporting Information

## **Increasing the Thermoelectric Power Factor of Solvent-Treated PEDOT:PSS Thin Films on PDMS by Stretching**

*Myeong Hoon Jeong\**, *Amit Sanger*, *Sung Bum Kang*, *Yeon Soo Jung*, *In Seon Oh*, *Jung Woo Yoo*, *Gun Ho Kim*, *Kyoung Jin Choi\**

|                                                                                            |    |
|--------------------------------------------------------------------------------------------|----|
| Seebeck coefficient and Resistance measuring equipment.....                                | S1 |
| Investigate for effect of the distance between the electrodes on Seebeck coefficient ..... | S2 |
| Optimizing pre-strained PDMS for highly stretchable PEDOT:PSS thin film .....              | S3 |
| Normalized resistance of PEDOT:PSS films coated on 30% pre-strained PDMS .....             | S4 |
| Phase AFM image of various treated PEDOT:PSS thin films .....                              | S5 |
| UV-Vis spectra of PEG treated PEDOT : PSS thin films with different strain .....           | S6 |
| Phase AFM image of pristine PEDOT:PSS thin films .....                                     | S7 |

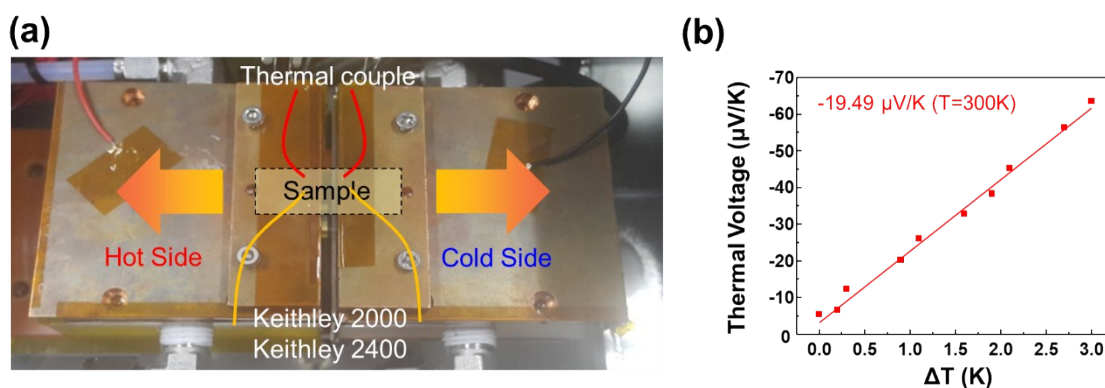

Fig. S1 (a) Photographic images of the custom-built resistance and Seebeck measurement setup. (b) Thermal voltage values of the PEDOT:PSS thin films depending on  $\Delta T$ . The Seebeck coefficient was determined by the slope of the linear fitting.

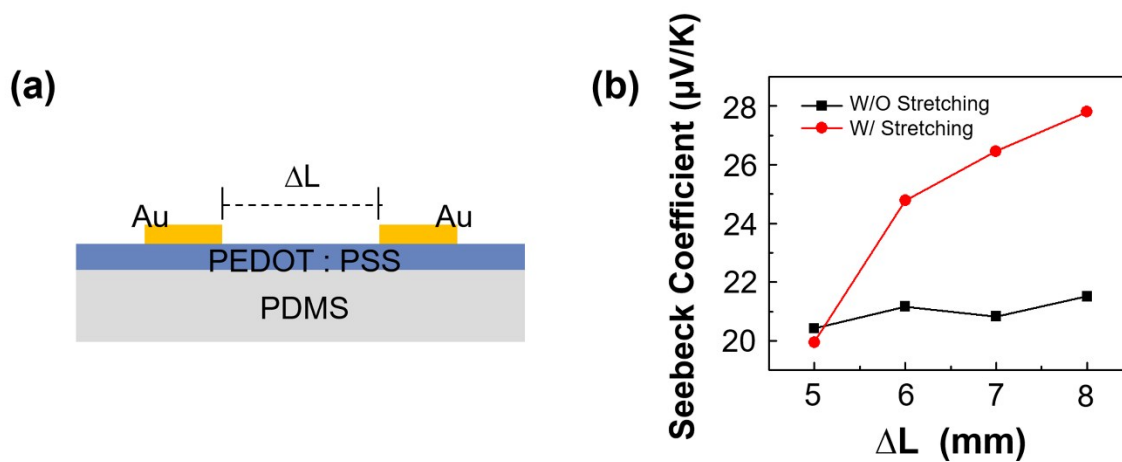

Fig. S2 (a) Schematic image of the experiment used to investigate the change in the Seebeck coefficient depending on the electrode distance. (b) Seebeck coefficients at different electrode distances measured with and without stretching.

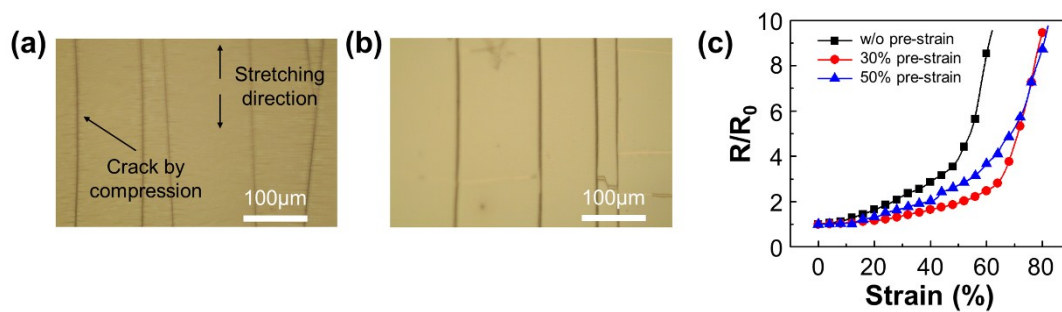

Fig. S3 Optical microscopy images of (a) the surface of a PEDOT:PSS thin film coated on 50% pre-strained PDMS and then released, (b) and after being stretched to 50% again. (c) Change in the normalized resistances of pre-strained PEDOT:PSS thin films.

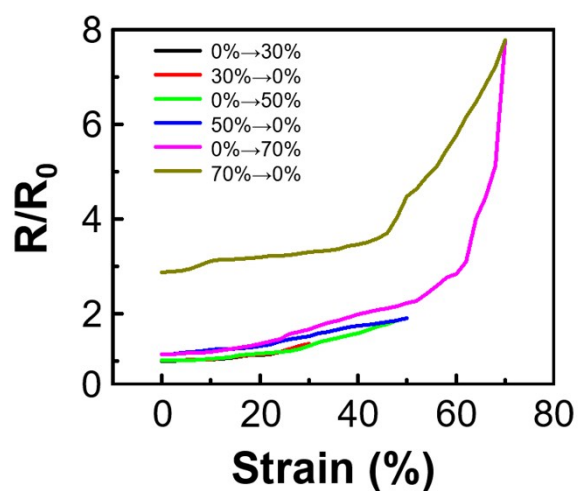

Fig. S4 Normalized resistance of PEDOT:PSS thin films coated on 30% pre-strained PDMS when stretched from 0% →30%→0%→50%→0%→70%→0%.

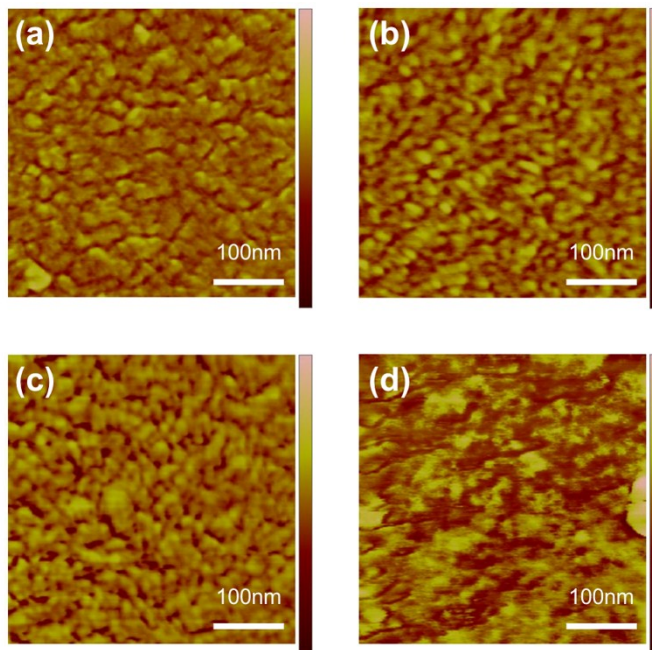

Fig. S5 Phase AFM image of (a) DMSO, (b) MeOH, (c) EG and (d) H<sub>2</sub>SO<sub>4</sub> treated PEDOT:PSS thin films

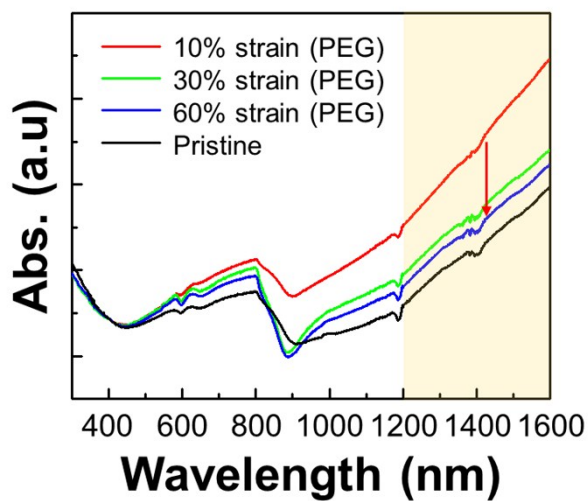

Fig. S6 UV-Vis spectra of PEG treated PEDOT : PSS thin films with different strain and pristine PEDOT:PSS thin films

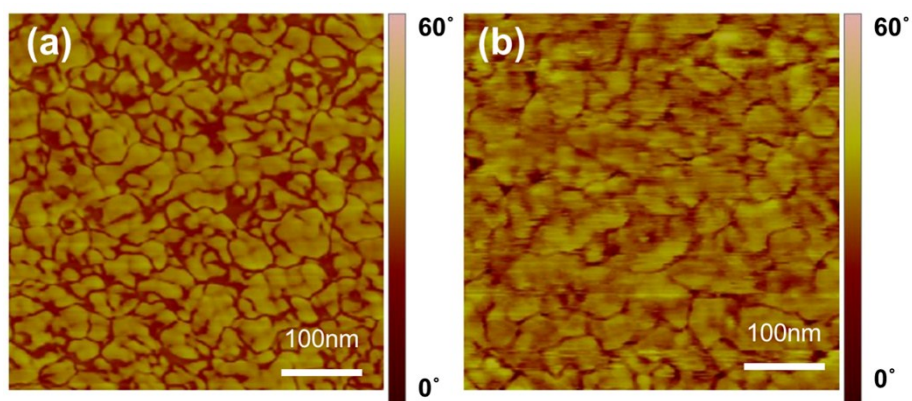

Fig. S7 Phase AFM image of pristine PEDOT:PSS thin films (a) under free-strained state and (b) 30% strained state.
